# Supplementary material for: The impact of momentary stress on autobiographical memory recall in a self-efficacy intervention
Source: PubMed Central journal article supplement (PMC11612412; doi:10.1038/s41598-024-80896-z), 2024-12-02
Supplement: 41598_2024_80896_MOESM1_ESM.pdf [file 41598_2024_80896_MOESM1_ESM.pdf]

## **Supplement**

### **The impact of momentary stress on autobiographical memory recall in a self-efficacy intervention**

Judith Rohde<sup>1,2 † \*</sup>, Laura E. Meine<sup>1,2 †</sup>, Adam D. Brown<sup>3,4</sup>, Birgit Kleim<sup>1,2</sup>

<sup>1</sup> Department of Adult Psychiatry and Psychotherapy, Psychiatric University Hospital Zurich, Lenggstrasse 31, CH-8032 Zurich, Switzerland

<sup>2</sup> Department of Psychology, University of Zurich, Binzmuehlestrasse 14, Box 1, CH-8050 Zurich, Switzerland

<sup>3</sup> Department of Psychology, New School for Social Research, New York, United States of America

<sup>4</sup> Department of Psychiatry, New York University School of Medicine, New York, United States of America

† These two authors contributed equally to this work.

\* Corresponding author (e-mail address: [judith.rohde@bli.uzh.ch](mailto:judith.rohde@bli.uzh.ch))

## Table of Contents

|                                                                                                                  |   |
|------------------------------------------------------------------------------------------------------------------|---|
| 1. <i>Supplementary Tables</i> .....                                                                             | 2 |
| Supplementary Table 1. Stress and recall difficulty – model details .....                                        | 2 |
| Supplementary Table 2. Stress and memory vividness – model details .....                                         | 2 |
| Supplementary Table 3. Feeling relaxed and recall difficulty – model details .....                               | 3 |
| Supplementary Table 4. Feeling relaxed and memory vividness – model details .....                                | 3 |
| Supplementary Table 5. GSE scores by time x recall difficulty – model details .....                              | 4 |
| Supplementary Table 6. GSE scores by time x memory vividness – model details .....                               | 4 |
| 2. <i>Supplementary Figures</i> .....                                                                            | 5 |
| Supplementary Figure 1. Moderation effect of average recall difficulty on pre-post change in self-efficacy ..... | 5 |
| Supplementary Figure 2. Moderation effect of average vividness on pre-post change in self-efficacy .....         | 5 |

## Supplementary Tables

### Supplementary Table 1. Stress and recall difficulty – model details

| <b>Fixed Effects</b>                                 |                  |           |               |          |              |
|------------------------------------------------------|------------------|-----------|---------------|----------|--------------|
| <i>Predictors</i>                                    | <i>Estimates</i> | <i>SE</i> | <i>95% CI</i> | <i>T</i> | <i>p</i>     |
| Intercept                                            | 0.01             | 0.04      | -0.06 – 0.08  | 0.24     | 0.808        |
| Stress level (within-person)                         | 0.11             | 0.04      | 0.03 – 0.20   | 2.73     | <b>0.006</b> |
| Prompt type                                          | -0.04            | 0.07      | -0.16 – 0.09  | -0.55    | 0.585        |
| <b>Random Effects</b>                                |                  |           |               |          |              |
| $\sigma^2$                                           | 0.90             |           |               |          |              |
| $\tau_{00}$                                          |                  |           |               |          |              |
| ICC                                                  | 0.04             |           |               |          |              |
| N <sub>id</sub>                                      | 54               |           |               |          |              |
| Observations                                         | 1046             |           |               |          |              |
| Marginal R <sup>2</sup> / Conditional R <sup>2</sup> | 0.013 / 0.056    |           |               |          |              |

### Supplementary Table 2. Stress and memory vividness – model details

| <b>Fixed Effects</b>                                 |                  |           |               |          |              |
|------------------------------------------------------|------------------|-----------|---------------|----------|--------------|
| <i>Predictors</i>                                    | <i>Estimates</i> | <i>SE</i> | <i>95% CI</i> | <i>T</i> | <i>p</i>     |
| Intercept                                            | 0.02             | 0.04      | -0.05 – 0.10  | 0.60     | 0.550        |
| Stress level (within-person)                         | -0.09            | 0.03      | -0.16 – -0.02 | -2.61    | <b>0.009</b> |
| Prompt type                                          | -0.07            | 0.07      | -0.20 – 0.06  | -1.10    | 0.273        |
| <b>Random Effects</b>                                |                  |           |               |          |              |
| $\sigma^2$                                           | 0.93             |           |               |          |              |
| $\tau_{00}$                                          |                  |           |               |          |              |
| ICC                                                  | 0.01             |           |               |          |              |
| N <sub>id</sub>                                      | 54               |           |               |          |              |
| Observations                                         | 1046             |           |               |          |              |
| Marginal R <sup>2</sup> / Conditional R <sup>2</sup> | 0.010 / 0.023    |           |               |          |              |

**Supplementary Table 3. Feeling relaxed and recall difficulty – model details**

| <i>Predictors</i>                                    | <b>Fixed Effects</b> |           |               |          |                  |
|------------------------------------------------------|----------------------|-----------|---------------|----------|------------------|
|                                                      | <i>Estimates</i>     | <i>SE</i> | <i>95% CI</i> | <i>T</i> | <i>p</i>         |
| Intercept                                            | 0.01                 | 0.04      | -0.06 – 0.09  | 0.41     | 0.684            |
| Feeling relaxed (within-person)                      | -0.18                | 0.04      | -0.25 – -0.10 | -4.76    | <b>&lt;0.001</b> |
| Prompt type                                          | -0.05                | 0.07      | -0.18 – 0.08  | -0.80    | 0.426            |
| <b>Random Effects</b>                                |                      |           |               |          |                  |
| $\sigma^2$                                           | 0.90                 |           |               |          |                  |
| $\tau_{00}$                                          |                      |           |               |          |                  |
| $\tau_{00}$                                          |                      |           |               |          |                  |
| ICC                                                  | 0.02                 |           |               |          |                  |
| N <sub>id</sub>                                      | 54                   |           |               |          |                  |
| Observations                                         | 1046                 |           |               |          |                  |
| Marginal R <sup>2</sup> / Conditional R <sup>2</sup> | 0.031 / 0.053        |           |               |          |                  |

**Supplementary Table 4. Feeling relaxed and memory vividness – model details**

| <i>Predictors</i>                                    | <b>Fixed Effects</b> |           |               |          |                  |
|------------------------------------------------------|----------------------|-----------|---------------|----------|------------------|
|                                                      | <i>Estimates</i>     | <i>SE</i> | <i>95% CI</i> | <i>T</i> | <i>p</i>         |
| Intercept                                            | 0.02                 | 0.04      | -0.06 – 0.09  | 0.48     | 0.635            |
| Feeling relaxed (within-person)                      | 0.15                 | 0.03      | 0.09 – 0.22   | 4.45     | <b>&lt;0.001</b> |
| Prompt type                                          | -0.06                | 0.07      | -0.19 – 0.07  | -0.84    | 0.401            |
| <b>Random Effects</b>                                |                      |           |               |          |                  |
| $\sigma^2$                                           | 0.92                 |           |               |          |                  |
| $\tau_{00}$                                          |                      |           |               |          |                  |
| $\tau_{00}$                                          |                      |           |               |          |                  |
| ICC                                                  | 0.01                 |           |               |          |                  |
| N <sub>id</sub>                                      | 54                   |           |               |          |                  |
| Observations                                         | 1046                 |           |               |          |                  |
| Marginal R <sup>2</sup> / Conditional R <sup>2</sup> | 0.024 / 0.036        |           |               |          |                  |

**Supplementary Table 5. GSE scores by time x recall difficulty – model details**

| <i>Predictors</i>                  | <b>Fixed Effects</b> |           |               |          |                  |
|------------------------------------|----------------------|-----------|---------------|----------|------------------|
|                                    | <i>Estimates</i>     | <i>SE</i> | <i>95% CI</i> | <i>T</i> | <i>p</i>         |
| Intercept                          | 24.74                | 0.90      | 22.93 – 26.55 | 27.39    | <b>&lt;0.001</b> |
| Time                               | 1.98                 | 0.49      | 1.00 – 2.96   | 4.06     | <b>&lt;0.001</b> |
| Recall Difficulty                  | -0.45                | 0.91      | -2.28 – 1.37  | -0.50    | 0.618            |
| Time x Recall Difficulty           | -0.47                | 0.49      | -1.46 – 0.51  | -0.96    | 0.341            |
| <b>Random Effects</b>              |                      |           |               |          |                  |
| $\sigma^2$                         | 6.43                 |           |               |          |                  |
| $\tau_{00 \text{ id}}$             | 11.89                |           |               |          |                  |
| $N_{\text{id}}$                    | 54                   |           |               |          |                  |
| Observations                       | 108                  |           |               |          |                  |
| Marginal $R^2$ / Conditional $R^2$ | 0.272 / NA           |           |               |          |                  |

**Supplementary Table 6. GSE scores by time x memory vividness – model details**

| <i>Predictors</i>                  | <b>Fixed Effects</b> |           |               |          |                  |
|------------------------------------|----------------------|-----------|---------------|----------|------------------|
|                                    | <i>Estimates</i>     | <i>SE</i> | <i>95% CI</i> | <i>T</i> | <i>p</i>         |
| Intercept                          | 24.74                | 0.91      | 22.91 – 26.57 | 27.16    | <b>&lt;0.001</b> |
| Time                               | 1.98                 | 0.49      | 0.99 – 2.97   | 4.03     | <b>&lt;0.001</b> |
| Vividness                          | 0.81                 | 0.92      | -1.03 – 2.65  | 0.89     | 0.380            |
| Time x Vividness                   | 0.15                 | 0.49      | -0.84 – 1.14  | 0.31     | 0.760            |
| <b>Random Effects</b>              |                      |           |               |          |                  |
| $\sigma^2$                         | 6.54                 |           |               |          |                  |
| $\tau_{00 \text{ id}}$             | 12.12                |           |               |          |                  |
| $N_{\text{id}}$                    | 54                   |           |               |          |                  |
| Observations                       | 108                  |           |               |          |                  |
| Marginal $R^2$ / Conditional $R^2$ | 0.241 / NA           |           |               |          |                  |

## Supplementary Figures

### Supplementary Figure 1. Moderation effect of average recall difficulty on pre-post change in self-efficacy

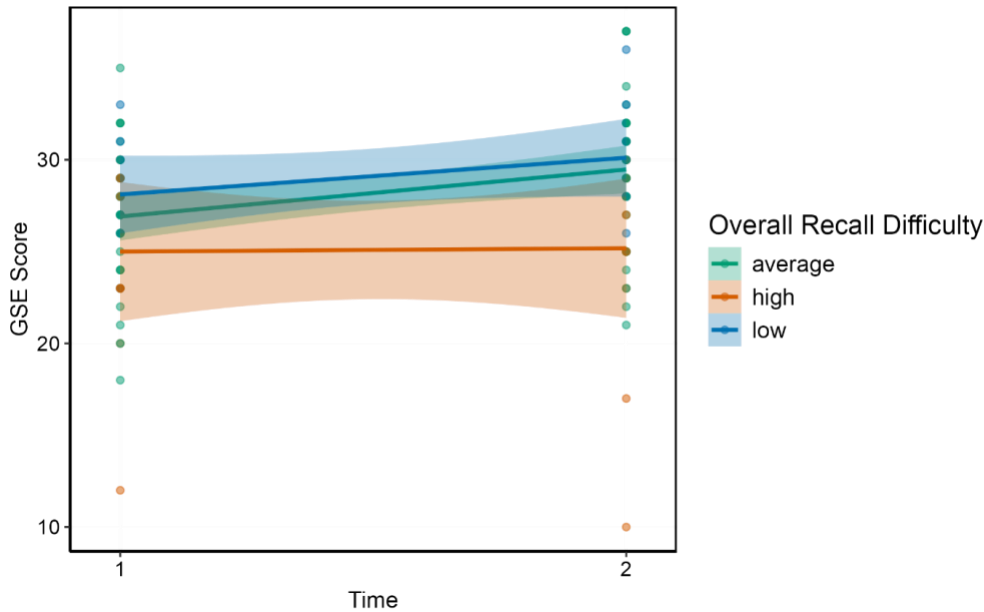

*Note.* For visualization purposes, we grouped individual data points for recall difficulty into high (values more than one standard deviation above the mean; red), average (values within one standard deviation around the mean; green), and low (values less than one standard deviation below the mean; blue). GSE = general self-efficacy.

### Supplementary Figure 2. Moderation effect of average vividness on pre-post change in self-efficacy

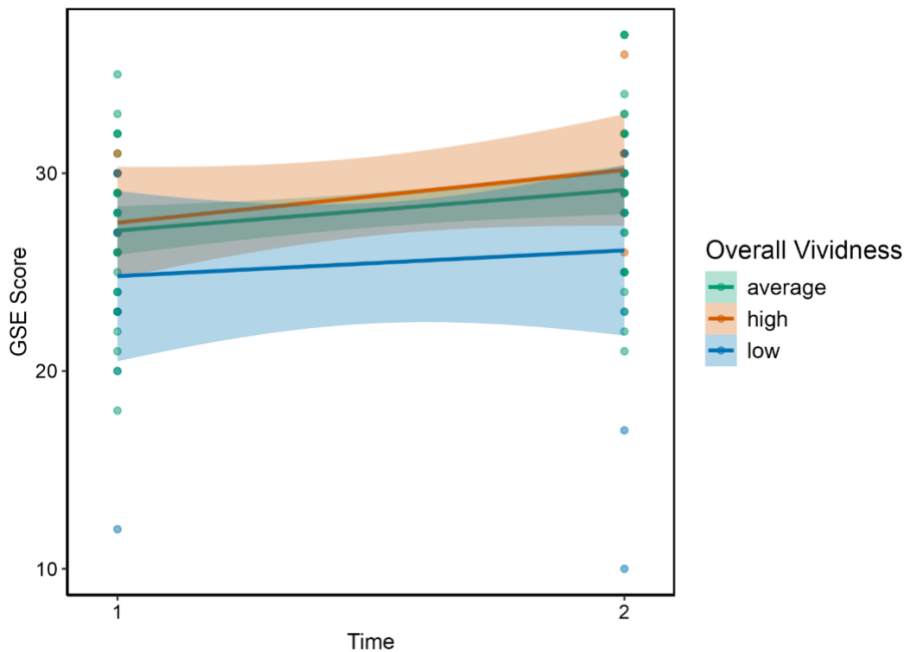

*Note.* For visualization purposes, we grouped individual data points for vividness into high (values more than one standard deviation above the mean; red), average (values within one standard deviation around the mean; green), and low (values less than one standard deviation below the mean; blue). GSE = general self-efficacy.
